# Dynamic Flux Balance Analysis Models in SBML

Matthias König<sup>1\*†</sup>, Leandro H. Watanabe<sup>3†</sup>, Jan Grzegorzewski<sup>1</sup>, Chris J. Myers<sup>2</sup>

<sup>1</sup>*Institute for Theoretical Biology, Institute of Biology, Humboldt University, Berlin, Germany*

<sup>2</sup>*Department of Electrical, Computer, and Energy Engineering, University of Colorado Boulder, CO 80309, USA*

<sup>3</sup>*Department of Electrical and Computer Engineering, University of Utah, UT 84112, USA*

<sup>†</sup>*These authors have contributed equally to this work and share first authorship*

Correspondence\*:

Matthias König  
koenigmx@hu-berlin.de

## 2 ABSTRACT

3 Computational models in systems biology and systems medicine are typically simulated using a  
4 single formalism such as ordinary differential equations (ODE). However, more complex models  
5 require the coupling of multiple formalisms since different biological phenomena are better  
6 described by different methods. For example, metabolism in steady state is often modeled using  
7 flux-balance analysis (FBA) whereas dynamic changes of model components are better described  
8 via ODEs. The coupling of FBA and ODE modeling formalisms results in dynamic FBA models.  
9 A major challenge is how to describe such hybrid models that couple multiple formalisms in a  
10 standardized way so that they can be exchanged between tools and simulated consistently in a  
11 reproducible manner. This paper presents a scheme for encoding and implementation of dynamic  
12 FBA models in the Systems Biology Markup Language (SBML), thereby enabling the exchange of  
13 multi-framework computational models between software tools. We demonstrate the feasibility of  
14 the approach using various example models and show that different tools are able to simulate the  
15 hybrid models and agree on the results. As part of this work, two independent implementations of  
16 a multi-framework simulation method for dynamic FBA have been developed supporting such  
17 models: `iBioSim` and `sbmlutils`.

18

19 **Keywords:** dynamic flux balance analysis, DFBA, flux balance analysis (FBA), ordinary differential equations (ODE), static optimization  
20 approach (SOA)

## 1 INTRODUCTION

21 In systems biology, mathematical modeling is used to investigate biological systems (Kitano, 2002). The  
22 resulting computational models enable researchers to make predictions *in silico* which can be validated  
23 experimentally. However, the process of model building is time-consuming and error-prone. Model  
24 reproducibility and exchangeability are of major importance for independent validation of results and  
25 model reuse, especially in the case of more complex models.

26 To achieve reproducibility, interoperability, and consistent model interpretation, a well-defined modeling  
27 representation with unambiguous syntax is crucial. To this end, standard model representation formats

28 exist that enable model exchange, such as the Systems Biology Markup Language (SBML) (Hucka et al.,  
29 2003; Keating et al., 2020; Hucka et al., 2019).

30 SBML has been successfully applied to the encoding of single formalism models, but the encoding of  
31 hybrid models using SBML has yet to be explored. Some tools have implemented hybrid simulation, such  
32 as COPASI (Hoops et al., 2006) and E-CELL (Tomita et al., 1999), nonetheless, they lack reproducibility.  
33 In COPASI, the models fall short of necessary pieces of information for model exchange. Namely, these  
34 models lack the information about their own model formalism which results in hybrid models being only  
35 specific to COPASI. In E-CELL, most models are encoded in C++ and only few in SBML. Even though  
36 the C++ models are repeatable, they are not reproducible because other tools cannot use these files and  
37 even models encoded in SBML are incomplete and lack the integration of different formalisms.

38 The support of hybrid modeling adds new challenges. The present work addresses this problem by  
39 developing a methodology in conjunction with implementations to support such hybrid modeling efforts.  
40 We demonstrate the usefulness of our approach by exchanging two models between two distinct simulation  
41 tools with both implementations leading to similar simulation results.

## 42 **1.1 Coupling multiple modeling formalisms**

43 Various simulation and analysis methods have been developed in systems biology. Depending on the  
44 biological question, different methods are preferred. Kinetic time-course simulations based on ordinary  
45 differential equations (ODE) are often employed to study the dynamics of entities in a model over time.  
46 Depending on the research question and biological system, such simulations can be non-deterministic  
47 (stochastic). Other popular simulation methods are Boolean (Thomas, 1973; Kauffman, 1969) models,  
48 logical models (Morris et al., 2010), and constraint-based approaches (Bordbar et al., 2014).

49 Dynamical modeling of metabolic networks by ODE approaches is particularly challenging since kinetic  
50 parameters needed for ODE models are often unobtainable (Varma and Palsson, 1994). Hence, steady-state  
51 approaches that do not need kinetic information are employed to model metabolism such as flux balance  
52 analysis (FBA) (Savinell and Palsson, 1992; Varma et al., 1993) which is based on constraint-based  
53 optimization. This method only requires the connectivity of the reactions and metabolites along with the  
54 respective stoichiometry, an objective function, such as cell growth, and additional constraints like flux  
55 bounds. The idea is to constrain the model based on the stoichiometry of the reactions and optimize the  
56 objective function while satisfying the flux constraints. These models do not require kinetic information  
57 and can be simulated efficiently even in case of very large systems.

58 Biological research questions often require the coupling of different model formalisms. One such recent  
59 example is the whole-cell model for the *Mycoplasma genitalium* (Karr et al., 2012) that is encoded using a  
60 mixture of Boolean networks, stochastic processes, differential equations, and FBA.

61

## 62 **1.2 Dynamic flux balance analysis**

63 One disadvantage of FBA is that it cannot express the dynamics of the metabolites since it does not change  
64 amounts or concentrations of species, but only provides information about the optimal flux distribution  
65 for the given optimization problem. Due to this limitation, the field of dynamic FBA (DFBA) (Varma and  
66 Palsson, 1994) has emerged, which couples the stationary flux distribution resulting from FBA with the  
67 kinetic update of the metabolites taken up or consumed by the FBA network. For DFBA models, a FBA  
68 submodel is coupled to a kinetic model (ODE).

69 Besides the whole-cell model, which uses DFBA as a core module, various metabolic pathways have  
70 been modeled using DFBA. DFBA has been applied in small-scale examples (Varma and Palsson, 1994;  
71 Mahadevan et al., 2002; Luo et al., 2006), over medium-size models (Pizarro et al., 2007; Lequeux et al.,  
72 2010; Meadows et al., 2010), and up to genome-scale DFBA applications (Hanly and Henson, 2011;  
73 Hjersted et al., 2007). For an overview, see Table 1 in (Höffner et al., 2013).

74 The coupling between FBA and kinetic model parts can be implemented via three main approaches: static  
75 optimization approach (SOA), dynamic optimization approach (DOA), and direct approach (DA) (Gomez  
76 et al., 2014). The SOA approach solves the linear programming (LP) problem of FBA at each time step  
77 using an Euler forward method assuming constant fluxes over the time step (Gomez et al., 2014). DOA  
78 approaches optimize simultaneously over the entire time period by solving a nonlinear programming  
79 problem (NLP). The DA approach directly includes the LP solver on the right-hand side of the ordinary  
80 differential equations (ODEs).

81 The advantage of the SOA is its relatively simple implementation, which is why most of the published  
82 DFBA models use the SOA approach. However, SOA is often less accurate compared to other computational  
83 more demanding methods such as DOA. The DA method exhibits the best trade-off between accuracy and  
84 runtime performance but has its downsides in terms of implementation difficulty. For this work, we use the  
85 SOA method. Its simplicity makes it a good candidate to use as proof of concept for this work.

### 86 **1.3 Exchangeability & reproducibility of models**

87 Despite the wide range of published DFBA models no standard for the exchange of such models exists.  
88 Existing models are hard-coded, such as the whole-cell model which is implemented in MATLAB. Hereby,  
89 the mathematical model is separated in the respective kinetic and FBA formalisms in a script along with the  
90 connections between the kinetic and flux balance parts of the models. As a consequence, it is not possible  
91 to exchange existing DFBA models between different software tools. Thus, they cannot be reproduced or  
92 validated. This is especially problematic in the case of DFBA models because often multiple optima can  
93 exist for the FBA model part (and the various time steps). The resulting DFBA results are not unique since  
94 they depend on the analysis implementation (how a solver selects one of the possible FBA solutions). In  
95 addition, the simulation results may depend on the selected step size of the SOA algorithm, in particular, if  
96 the step size is not small enough.

97 While it is possible to replicate the same scripts in different programming languages, it is unpractical,  
98 error-prone, unnecessary, often leads to data loss, and most importantly does not solve the underlying  
99 problem of non-exchangeability of such models. For these reasons, script replication makes achieving  
100 reproducibility difficult and often infeasible. The necessity of an exchange format for DFBA emerged from  
101 efforts trying to encode and reproduce the DFBA submodel of the whole-cell model using standards during  
102 the whole-cell workshop (Waltemath et al., 2016).

### 103 **1.4 Model standards**

104 To achieve exchangeability and reproducibility of models, standards for the encoding of models have  
105 been created. The de-facto standard for systems biology models is SBML (Hucka et al., 2003; Keating  
106 et al., 2020). SBML core elements are used to describe mathematical models of reaction-based networks  
107 and provide the means to encode computational models based on reaction networks that can be represented  
108 both deterministically and stochastically. SBML uses packages for extending the functionality of core  
109 elements. While SBML is used to encode mathematical models of biological networks, there are different  
110 standards for other purposes: the Simulation Experiment Description Markup Language (SED-ML) is used  
111 for describing simulations (Waltemath et al., 2016; Bergmann et al., 2018), the Systems Biology Graphical

112 Notation (SBGN) is used for describing visualizations (Le Novère et al., 2009), and COMBINE Archives  
113 are used for grouping files in a single archive necessary to reproduce a modeling experiment (Bergmann  
114 et al., 2014). The main advantage of using these standards over hard-coding models in code is the ability to  
115 exchange models between research groups and reproduce results using various tools that support these  
116 standards. In addition, these standards enable the use of semantic annotations to document the model and  
117 model components which enhances the reusability and interoperability (Neal et al., 2019, 2020).

118 One of the challenges in SBML models is the limitation of models to a single formalism lacking support  
119 for the expression of models using multiple formalisms. Although there are several tools that support ODE  
120 simulation and FBA, they all support them independently. In order to overcome this challenge, this paper  
121 introduces a scheme that enables the coupling of ODE and FBA models. This paper demonstrates that this  
122 scheme facilitates exchangeability and reproducibility by encoding and simulating DFBA models in both  
123 `iBioSim` (Watanabe et al., 2019) and `sbmlutils` (König, 2022).

## 2 MATERIAL AND METHODS

### 124 2.1 Model encoding

125 The DFBA models presented in this paper were created in the proposed scheme either using a graphical  
126 user interface in `iBioSim` or a script-based approach in `sbmlutils`. For a given model, the four  
127 submodels (TOP, FBA, BOUNDS, and UPDATE) were packaged with the corresponding simulation files  
128 using SED-ML in COMBINE archives in order to facilitate the exchange between tools. All models and  
129 simulation results are available from <https://github.com/matthiaskoenig/dfba>.

### 130 2.2 Stationary optimization approach (SOA)

131 A stationary optimization approach for DFBA was implemented as a simulation algorithm in `iBioSim`  
132 and `sbmlutils` following the simulation scheme depicted in Figure 1.

133 The following paragraph assumes familiarity with SBML and we refer to the SBML specification for  
134 more information (Hucka et al., 2019). As the first step, all of the species and parameters in the model are  
135 initialized and each variable is assigned an initial value. After the initialization step, the FBA submodel is  
136 executed. During the FBA step, reaction fluxes are computed using the initial flux bound values where  
137 the flux bounds for the reactions come from the top-level using replacements from the SBML comp  
138 package (Smith et al., 2015). In SBML, replacements of parameters and species indicate the top-level  
139 entities are the same entity as the one being replaced. Once the fluxes are computed, they are assigned on  
140 the top-level to parameters using assignment rules. These parameters represent reaction rates.

141 After computing reaction fluxes, the update step is performed concurrently with a dynamic step by  
142 computing the time-evolution of every species in the UPDATE and KINETIC submodels. Species that  
143 affect any flux bound in the FBA submodel are updated on the top-level. The new bounds are used in the  
144 FBA submodel for the next time step. Simulation time is incremented at the end. If the time limit is reached,  
145 then the simulation is complete. Otherwise, all of the steps are repeated.

146 The SOA simulation algorithm has been implemented in `iBioSim` and `sbmlutils`. The `iBioSim`  
147 tool uses the structure of (Watanabe and Myers, 2014) for simulation. The `sbmlutils` tool uses  
148 roadrunner (Somogyi et al., 2015) for the kinetic simulation and cobrapy (Ebrahim et al., 2013) to solve  
149 the FBA problem. Both `iBioSim` and `sbmlutils` take an SBML file that describes a DFBA model and  
150 a SED-ML file that describes the simulation experiment. In the proposed approach, SED-ML is mainly  
151 used to indicate which simulation algorithm to use, the time points in which tools should print out the  
152 values of the variables, the initial time, and the time limit. The SED-ML files provide a minimal simulation

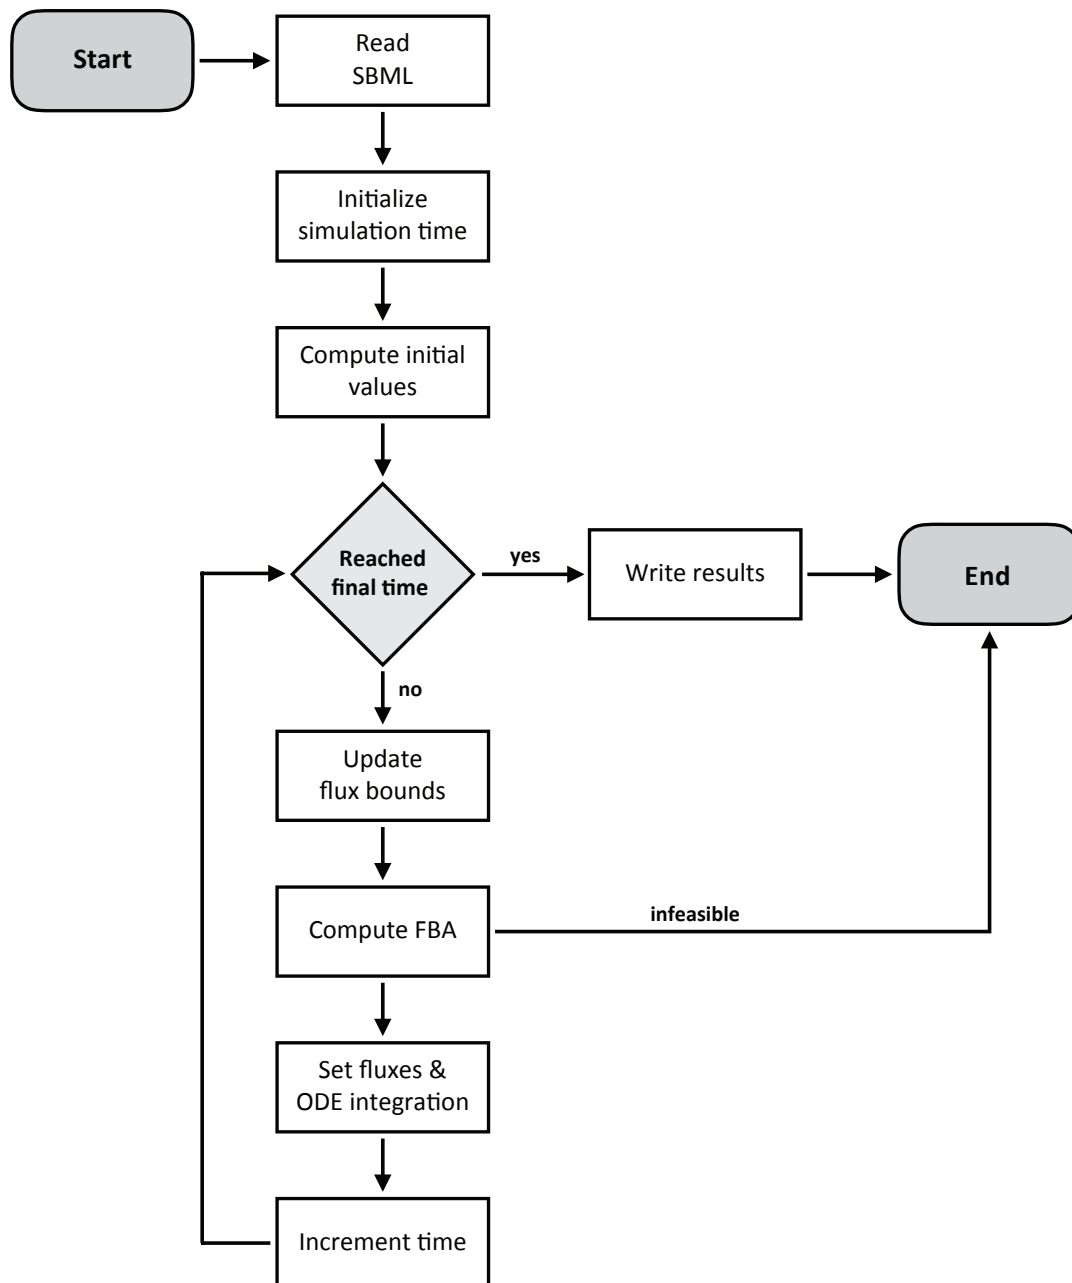

**Figure 1.** Overview of the implemented SOA algorithm for DFBA. After the initialization of the model, the FBA and kinetic simulations are run iteratively until the simulation endpoint. In every step, FBA is used to compute the reaction rates of the FBA network. Subsequently, based on the computed FBA rates, the values of the species are updated dynamically. In the SOA approach, FBA fluxes are assumed to be constant within a time step. For a detailed description see the Material And Methods Section.

153 experiment to check reproducibility between implementations. The value of each time increment for SOA  
154 is defined by a parameter with id `dt` in the SBML model, which can be overwritten by the SED-ML  
155 file for the actual simulation. An ontology term for the description of DFBA simulation algorithms has  
156 been introduced in the Kinetic Simulation Algorithm Ontology (KISAO) (Zhukova et al., 2011), term  
157 `KISAO:0000500` corresponding to the DFBA-SOA method, and is used in the SED-ML descriptions.



## 158 2.3 Reproducibility between tools

159 In order to test interoperability based on the proposed scheme, models were built in both the `iBioSim`  
160 and the `sbmlutils` tools. Models built in `iBioSim` were then imported into `sbmlutils` and vice-  
161 versa to check whether models could be interpreted by both tools consistently. This was done in an iterative  
162 manner and issues were solved by clarifying the encoding scheme by adding additional rules which  
163 resolved ambiguities. Ensuring reproducibility for DFBA models is challenging because there may exist  
164 several possible outcomes that satisfy the objective function and constraints of the FBA models. Different  
165 trajectories can result from the DFBA simulation depending on how a solver and implementation selects  
166 one of the multiple optima. The issue of multiple optima was solved by guaranteeing uniqueness of the  
167 solution in every time step based on Flux Variability Analysis (FVA) (Mahadevan and Schilling, 2003).  
168 FVA gives the possible minimal and maximal fluxes for each reaction in each step of the simulation. If all  
169 minimal fluxes are equal to all maximal fluxes for a time point a solution is unique in the time point. If all  
170 time points are unique the solution is unique. As a practical note: If the solution is not unique, the addition  
171 of additional constraints to the FBA problem allows to make the solution unique. Reproducibility of the  
172 model simulations was tested by comparing the numerical SOA results between the two tools for models  
173 with unique solutions (see Supplementary Material S2). Results were assumed as numerically identical if  
174 the absolute difference for every time point  $t_k$  for all dynamical FBA species in the model  $c_k$  was smaller  
175 than the tolerance  $\epsilon = 10^{-5}$ . The difference is computed as follows:

$$abs(c_i(t_k)_{sbmlutils} - c_i(t_k)_{ibiosim}) \leq \epsilon \forall c_i, t_k$$

176 In SOA-DFBA, it is important that the time steps  $dt$  are small enough so that the solution converges  
177 against the optimal solution. Solutions vary if selected step sizes are too large. To highlight this fact,  
178 changing the step size in the `toy_wholecell` model from 1.0 to 0.1 resulted in differences in steady-  
179 state concentrations of up to 10%. Consequently, the step size was reduced until the changes did not affect  
180 the simulation results.

## 3 RESULTS

181 The major result of this work is the creation of the first schema for a DFBA encoding in SBML,  
182 demonstrating hybrid computational models to be exchangeable and reproducible between tools. In  
183 the following, the schema and its application to multiple DFBA models is presented.

### 184 3.1 Schema for dynamic flux balance analysis

185 This paper proposes for the first time a schema to encode hybrid models, such as DFBA model,  
186 in SBML. The developed schema consists of rules, guidelines, and additional information and is  
187 available in the Supplementary Material S1. The latest version of the document is available from  
188 <https://github.com/matthiaskoenig/dfba/>. Proposals, errata, and updates to the schema are managed via the  
189 respective issue tracker and releases.

190 In this Section, we provide a high-level overview of the underlying concepts used in the schema, followed  
191 by an application of the schema to encode DFBA models.

192 The DFBA model is constructed hierarchically using the SBML comp package, separating the hybrid  
193 model into different building blocks based on the respective functionality and modeling frameworks  
194 (Figure 2). The top-level model is hereby composed of four submodels: (i) a kinetic submodel that  
195 computes flux bounds based on the dynamic metabolite availability and ensures that the FBA problem is

196 constrained by the available metabolite resources (BOUNDS submodel); (ii) a FBA submodel that encodes  
197 metabolism as a FBA problem (FBA submodel); and (iii) a kinetic submodel that updates the amounts and  
198 concentrations of the dynamic metabolites changed via the FBA submodel via consumption or production  
199 (UPDATE submodel); (iv) an optional kinetic submodel that represents a dynamic part with all kinetics  
200 other than the metabolic pathway, such as DNA transcription, DNA translation, and protein degradation,  
201 among others (KINETIC submodel). Alternatively, arbitrary kinetics can be part of the top model.

202 The top-level model couples the three different submodels using SBML `comp replacedElement`  
203 and `replacedBy` constructs with the interface between the submodels defined via `comp ports` (which  
204 define which model components of the submodels can be connected, i.e. are exposed).

205 In order to describe the different formalisms of each submodel, the Systems Biology Ontology (SBO)  
206 is used (Courtot et al., 2011). The SBO defines controlled vocabulary terms used in the systems biology  
207 field. The SBO terms are arranged in a taxonomic hierarchy using a tree structure. This allows the  
208 grouping of terms that are related to one another. The modeling formalisms of the individual submodels  
209 are described using terms on the modeling framework branch, where FBA models are described using the  
210 flux balance framework term, stochastic processes are described using the non-spatial discrete framework  
211 term, and differential equations are described using the non-spatial continuous framework term. Although  
212 the terms for stochastic processes and differential equations can be used for describing either stochastic or  
213 deterministic simulation methods, these terms were selected because they are the ones that best describe  
214 these two formalisms.

215 In addition to the modeling formalism, other key components are annotated in the submodels via SBO  
216 terms in the schema, like the upper and lower flux bounds and the exchange reactions in the FBA submodel  
217 defining which metabolites can be consumed or produced in the FBA part of the DFBA, or the dynamic  
218 species in the top model changed by the FBA submodel. By the means of these annotations, the interface  
219 between the hybrid submodels can be clearly defined.

220 All of the interconnections between the submodels are encoded in SBML rather than using an external  
221 approach like for instance via SED-ML. The connections between model components are crucial  
222 information of the model and should be part of the model encoding. SED-ML is only used to encode which  
223 simulation to run with the model. As a consequence, this schema requires only a single hierarchical SBML  
224 model and a single SED-ML file.

### 225 **3.2 Minimal Example (`toy_wholecell`)**

226 In order to illustrate the proposed schema, a simplified example of a whole-cell model was created  
227 and visualized. The corresponding files ( i.e. COMBINE archive and Cytoscape visualization) are in  
228 Supplementary Material S3. The visualization shows how the different submodels connect with each other  
229 in a flat form.

230 This model is constructed hierarchically where a top-level model is created to instantiate different  
231 submodels (BOUNDS, UPDATE, and FBA) and make the necessary connections between them. The figure  
232 illustrates the structure of each submodel and how each submodel ties in with each other in a flat version of  
233 the model once all of the connections are established.

234 In the example, the FBA submodel imports species A and convert it via a linear chain of reactions to  
235 species C. The exchange reactions `EX_A` and `EX_C` contain the rate of consumption and production of  
236 the respective species. The TOP model contains assignment rules that assign the fluxes to the parameters  
237 `pEX_A` and `pEX_C`. The `pEX_A` and `pEX_C` parameters are used by the UPDATE model to compute the new

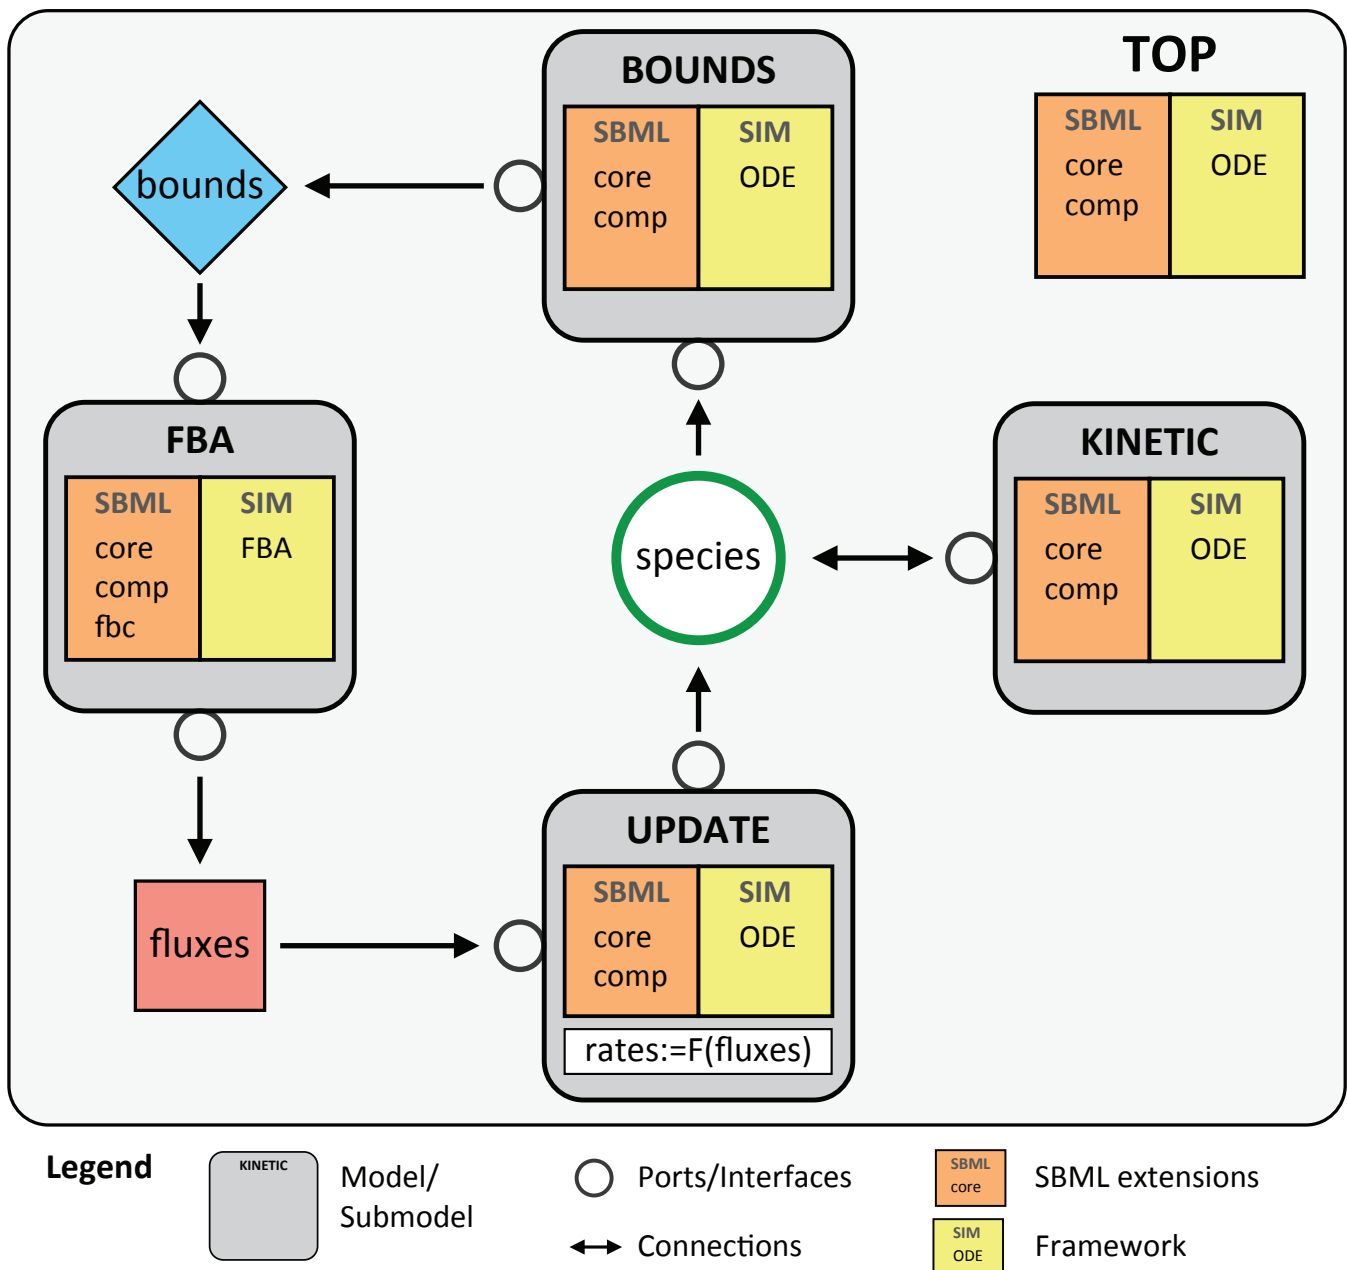

**Figure 2.** Overview of the schema for DFBA model encoding in SBML. The hierarchical SBML model is composed of a top-level model with four submodels: FBA, BOUNDS, UPDATE, and KINETIC. The individual submodels are connected via ports. The respective SBML packages used are listed in the models, as well as the employed simulation method. The BOUNDS submodel calculates the upper and lower flux bounds based on metabolite availability. The FBA submodel computes the reaction fluxes of the metabolic model encoded via the SBML fbc package using the bounds as constraints. The UPDATE submodel calculates the dynamic update of the dynamic metabolites affected by the FBA model. The rates of change are hereby functions of the FBA fluxes. The KINETIC submodel includes all of the other processes in the model, which may affect or be affected by entities in metabolism. The top-level model ties together the different submodels using SBML comp replacedElement and replacedBy constructs.

238 values of the dynamic species A and C via the update reactions `update_A` and `update_C`. The BOUNDS  
 239 model calculates the bounds of all FBA exchange reactions (constraining the availability of the dynamic  
 240 species). In the example, the upper bound `ub_R1` of reaction R1 is changed via a rate rule. Additional



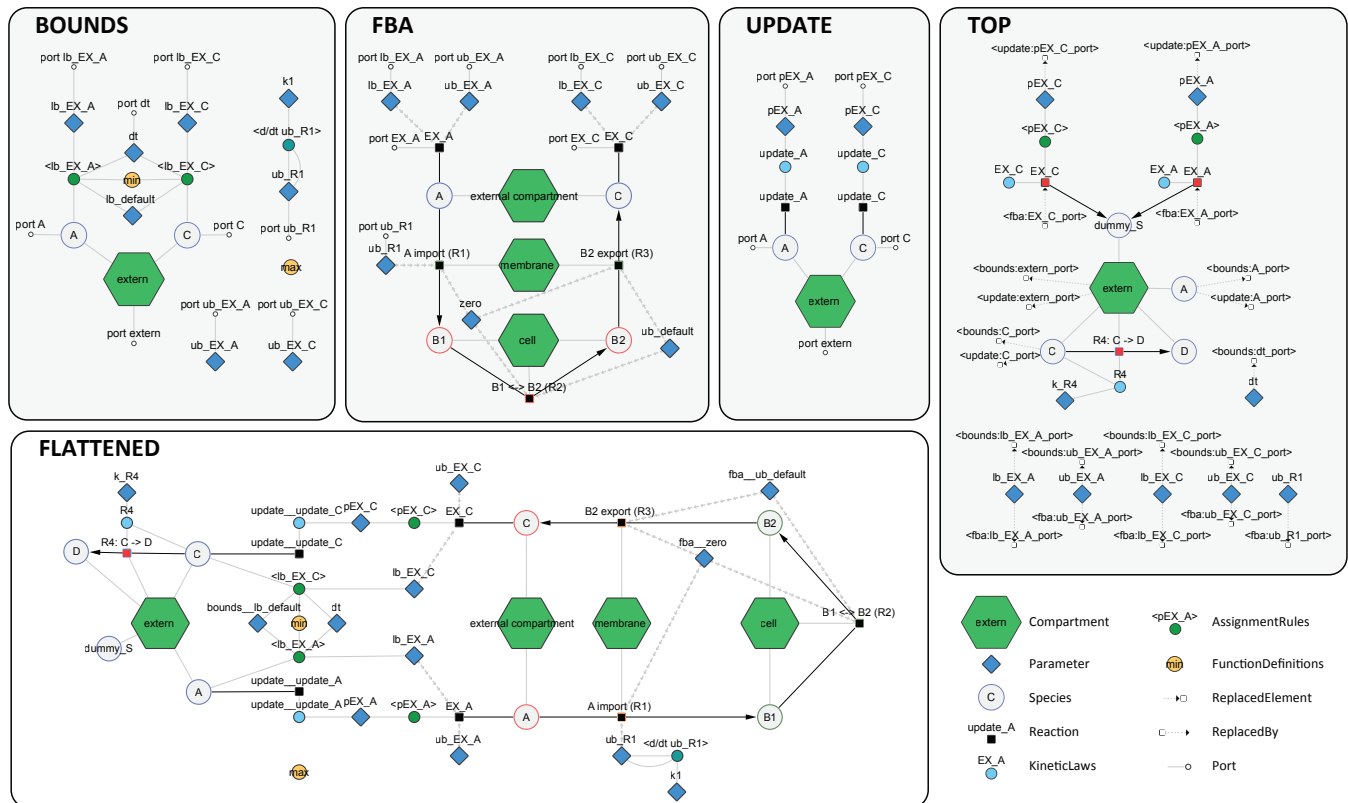

**Figure 3.** Detailed schema of the minimal example model (*toy\_wholecell*). The figure shows the components in the BOUNDS, FBA and UPDATE submodels. Links between submodel components are based on ports which are connected elements via TOP model replacements (*replacedElements* and *replacedBy*). The flattened SBML comp model (FLATTENED) shows the resolved connections between the different submodels after these replacements have been performed. The flattened model can not be simulated because the separation of the modeling formalisms is lost in the flattening process. The network visualization are available as interactive graphs in Cytoscape as Supplementary Material, which provide additional information and annotation of the components. The figure was created with *cy3sbml* using the SBML models (König et al., 2012).

241 kinetics are encoded in the TOP model, such as the kinetic conversion of C to D (these could also be in a  
 242 separate KINETIC submodel).

243 In order to validate the exchangeability and reproducibility of the model, simulations were performed  
 244 using the simulation algorithm described in Figure 1 with results depicted in Figure 4. Both implementations  
 245 resulted in numerically identical results (see Section 2.3). Importantly, our encoding schema allowed to  
 246 reproduce the numerical results even if the step sizes were not yet small enough to have converged against  
 247 the correct solution, thereby allowing to test the effects of varying step sizes in a reproducible manner.

248 In addition to the presented minimal model, a second model and its corresponding Cytoscape visualization  
 249 of a simplified DFBA glycolysis (*toy\_atp*) is available in the supplement (COMBINE archive in  
 250 Supplementary Material S3)

### 251 3.3 Diauxic growth in *Escherichia coli* (*diauxic\_growth*)

252 The next example is an encoding and reproduction of results from a published DFBA model of diauxic  
 253 growth of the *Escherichia coli* (Mahadevan et al., 2002) consisting of four reactions between four

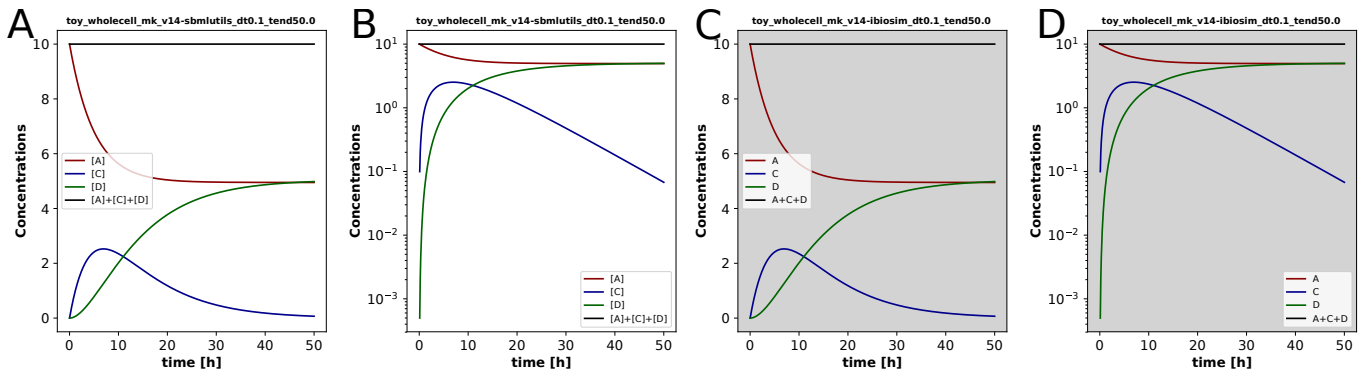

**Figure 4.** DFBA simulation results for the `toy_wholecell` model in two different tools (`sbmlutils`: **A, B**; `iBioSim`: **C, D**). This demonstrates that models can be exchanged by different tools using standards and the results can be reproduced when using the same simulation algorithm. Species A is converted to C via the FBA subnetwork over time. Species C is converted to D via the kinetic parts in the top model. Species A is not consumed completely because of the import of A in the FBA subnetwork via R1 which is shut down over time via a rate rule for the upper flux bound. The model was simulated for 50[h] with a time step  $dt$  of 0.1[h].

254 metabolites: glucose ( $Glcxt$ ), oxygen ( $O_2$ ), acetate ( $A_c$ ), and biomass ( $X$ ). The model can grow either  
 255 aerobically on acetate ( $v1$ ), aerobically on glucose ( $v2$  or  $v3$ ), or anaerobically convert glucose to acetate:

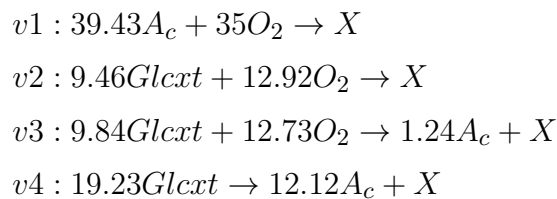

The kinetic part of the model is described by the following differential equations:

$$\begin{aligned}
 \frac{dGlcxt}{dt} &= A^{Glcxt} \nu X \\
 \frac{dA_c}{dt} &= A^{A_c} \nu X \\
 \frac{dO_2}{dt} &= A^{O_2} \nu X + k_{La}(0.21 - O_2) \\
 \frac{dX}{dt} &= (v1 + v2 + v3 + v4)X
 \end{aligned}$$

256 where  $A^{Glcxt}$ ,  $A^{A_c}$ ,  $A^{O_2}$  are the respective rows of each variable in the stoichiometry matrix and  $k_{La}$  is the  
 257 mass transfer coefficient of oxygen. For a detailed description see (Mahadevan et al., 2002).

258 The model and its corresponding Cytoscape visualization is available in Supplementary Material S3.

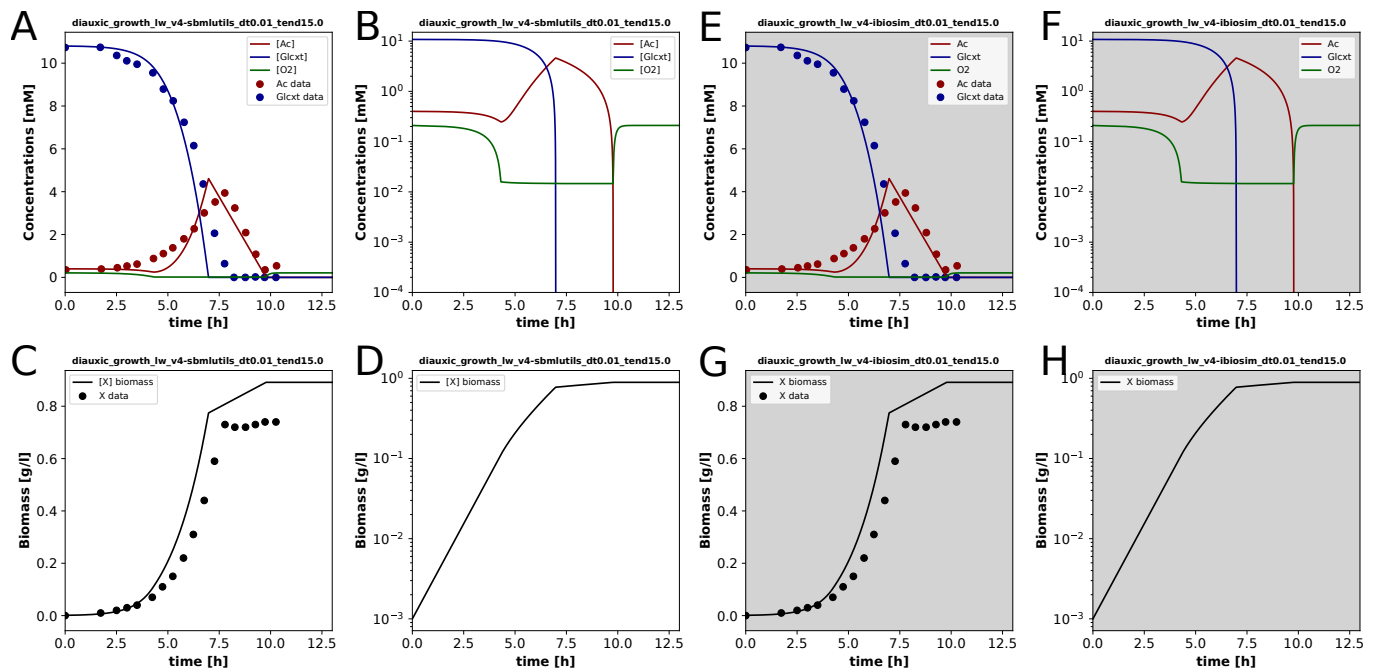

**Figure 5.** Simulation results for the diauxic growth of *Escherichia coli* in *sbmlutils* (A, B, C, D) and *iBioSim* (E, F, G, H). The model is able to reproduce the general behavior from experimental data. The cell is growing exponentially while glucose is present, but when the cell runs out of glucose, growth slows down and is limited mainly by oxygen. However, when the cell runs out of glucose and oxygen, growth diminishes significantly. The model was simulated for 15[h] with a time step  $\Delta t$  of 0.01[h].

259 The results in Figure 5 depict an exponential growth phase using glucose aerobically until running out  
 260 of glucose, which at this point the cell grows linearly due to oxygen. When both oxygen and glucose run  
 261 out, the cell growth stagnates. Experimental data from (Varma and Palsson, 1994) is plotted alongside the  
 262 simulation results. The model is able to capture the behavior observed in the experimental data. The results  
 263 are equivalent to the models in (Mahadevan et al., 2002).

264 We hereby showed that our schema is able to encode published DFBA models, resulting in a reproducible  
 265 and exchangeable model representation between tools.

### 266 3.4 *Escherichia coli* Core Metabolism (*eco1i*)

267 To demonstrate the feasibility of the proposed schema and method for real-world examples of DFBA,  
 268 a larger metabolic network for the core metabolism of *Escherichia coli* (Orth et al., 2010) was encoded  
 269 in the proposed schema and simulated as shown in Figure 6. The model is available as COMBINE  
 270 archive in Supplementary Material S3. The FBA submodel was downloaded from BiGG (King et al.,  
 271 2016) (core metabolism of *Escherichia coli* str. K-12 substr. MG1655) and transformed to an DFBA  
 272 model in an automatic fashion using *sbmlutils*. BiGG models encode the exchangeable species via  
 273 annotated exchange reactions which allows an automatic inference of the dynamic species. Only additional  
 274 information required to run a DFBA simulations are initial concentrations for the species. The automatic  
 275 encoding of larger scale examples demonstrates the scalability of the proposed encoding approach.

276 While *sbmlutils* is able to find a solution for the model, *iBioSim* cannot as it runs into an unfeasible  
 277 solution in the middle of simulation. This captures the well-known problem of DFBA with multiple  
 278 solutions. The FBA problem is not constrained enough to result in a unique solution and depending on  
 279 which solution the simulator picks, different solutions and thereby trajectories arise. Despite the existence

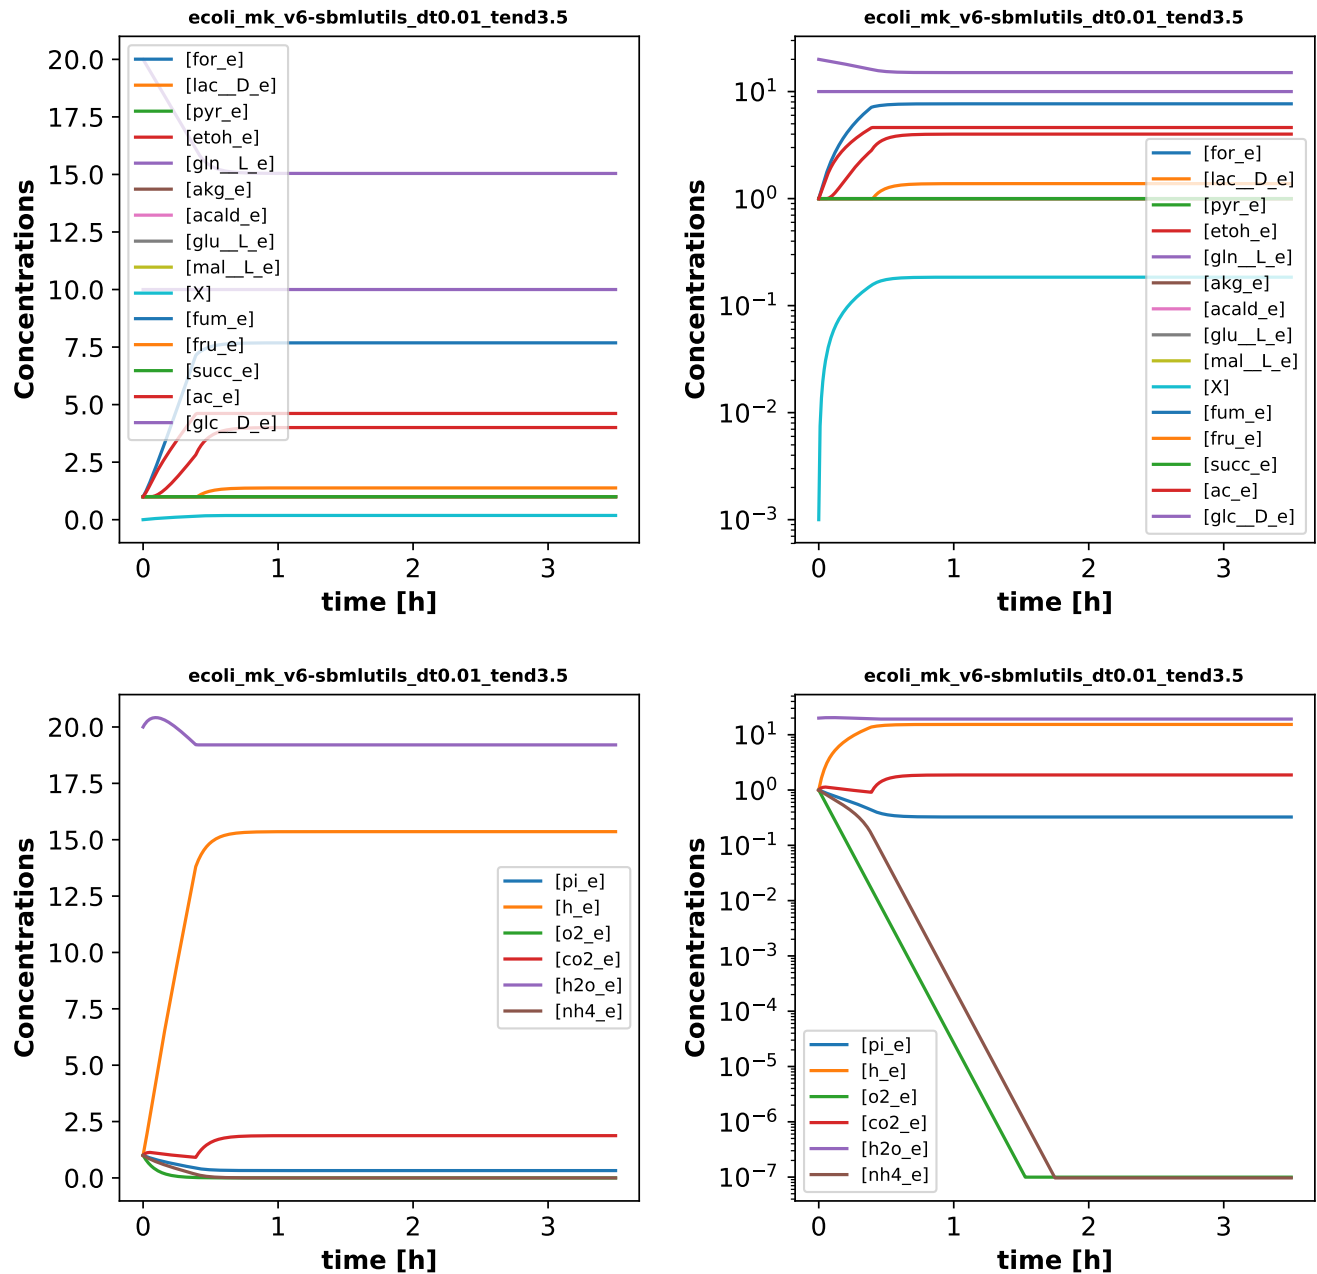

**Figure 6.** DFBA simulation results for core metabolism of *Escherichia coli* with sbmlutils. The proposed approach can be used in larger models, such as the *Escherichia coli* model described in the paper. The model is growing aerobically on glucose in the initial phase and reaches a steady state after oxygen is consumed. The model was simulated for 3.5[h] with a time step  $\Delta t$  of 0.01[h].

280 of multiple solutions, tools and LP solvers typically pick solutions deterministically. Hence, single tools  
281 can reproduce their own results, but results are irreproducible between different implementations. Without  
282 the use of standards, this could never be demonstrated because variations in results could be due to  
283 discrepancies in the model, and not in the tool.

#### 4 DISCUSSION

284 The ability to encode hybrid models, modularity and reproducibility of models are indispensable for  
285 encodings of complex models in computational biology. In this work, we presented such an approach,

286 which allows a clear separation of the different modeling formalisms via hierarchical models and defining  
287 the interfaces between the submodels. Here we propose and implement an exchangeable and reproducible  
288 hybrid modeling scheme. This scheme for encoding DFBA models has been implemented in two different  
289 tools, demonstrating the exchangeability and reproducibility of our approach on various examples models.  
290 `iBioSim` and `sbmlutils` are freely available for download and offer the necessary infrastructure for  
291 anyone to develop DFBA models using the proposed scheme. Currently, the proposed approach supports  
292 the modeling of DFBA models based on the SOA simulation algorithm. Hence, our approach only covers a  
293 subset of DFBA algorithms and a subset of possible frameworks.

294 Most DFBA models are stiff. Hence, short time steps are required for stability and for accurate results.  
295 Due to the need for short time steps, the SOA approach is computationally expensive. Future directions  
296 include the exploration of adaptive time steps for executing the DFBA with SOA, alternative DFBA  
297 methods, such as DOA or DA, and extending our scheme to encode such models.

298 Our current approach is limited to the coupling of ODEs to FBA models. Different hybrid modeling  
299 types, such as any mixtures of differential equations, stochastic processes, or Boolean models may yield  
300 promising results in the future. The proposed approach of decoupling different modeling formalisms via  
301 the `comp` package could work similarly for other modeling frameworks like Boolean models.

302 So far, only small to medium-size DFBA models have been encoded in our proposed approach. For future  
303 work, we will encode genome-scale metabolic models such as HepatoNet1 (Gille et al., 2010) which will  
304 allow us to assess the scalability and performance of the proposed approach.

## CONFLICT OF INTEREST STATEMENT

305 All authors declare that the research was conducted in the absence of any commercial or financial  
306 relationships that could be construed as a potential conflict of interest.

## AUTHOR CONTRIBUTIONS

307 MK and LHW designed the study, developed the computational models, implemented and performed  
308 the analysis, and wrote the initial draft of the manuscript. All authors discussed the results. All authors  
309 contributed to and revised the manuscript critically.

## FUNDING

310 MK and JG are supported by the Federal Ministry of Education and Research (BMBF, Germany)  
311 within the research network Systems Medicine of the Liver (LiSyM) (grant number 031L0054). MK  
312 is supported by the German Research Foundation (DFG) within the Research Unit Programme FOR  
313 5151 "QuaLiPerF (Quantifying Liver Perfusion-Function Relationship in Complex Resection - A Systems  
314 Medicine Approach)" by grant number 436883643 and by grant number 465194077 (Priority Programme  
315 SPP 2311, Subproject SimLivA). LHW and CJM are supported by the National Science Foundation under  
316 Grants CCF-1218095 and CCF-1748200. Any opinions, findings, and conclusions or recommendations  
317 expressed in this material are those of the authors and do not necessarily reflect the views of the  
318 Federal Ministry of Education and Research, the German Research Foundation, and the National Science  
319 Foundation.

## DATA AVAILABILITY STATEMENT

320 **Availability:** All materials and models are available from <https://github.com/matthiaskoenig/dfba>. The  
321 tools used in this project are freely available: `iBioSim` at <https://www.async.ece.utah.edu/ibiosim> and



322 sbmlutils at <https://github.com/matthiascoenig/sbmlutils/>.

323

## 5 SUPPLEMENTARY MATERIAL

324 Supplementary Material is available online.

325 **S1** Schema for encoding DFBA in SBML.

326 **S2** Reproducibility results between sbmlutils and iBioSim.

327 **S3** texttttoy\_wholecell COMBINE archive and Cytoscape figure for DFBA models (minimal model,  
328 minimal glycolysis model, diauxic model, and Escherichia coli core model).

## REFERENCES

- 329 Bergmann, F. T., Adams, R., Moodie, S., Cooper, J., Glont, M., Golebiewski, M., et al. (2014). COMBINE  
330 archive and OMEX format: One file to share all information to reproduce a modeling project. *BMC*  
331 *bioinformatics* 15, 369. doi:10.1186/s12859-014-0369-z
- 332 Bergmann, F. T., Cooper, J., König, M., Moraru, I., Nickerson, D., Le Novère, N., et al. (2018). Simulation  
333 Experiment Description Markup Language (SED-ML) level 1 version 3 (L1V3). *Journal of Integrative*  
334 *Bioinformatics* 15, /j/jib.2018.15.issue-1/jib-2017-0086/jib-2017-0086.xml. doi:10.1515/jib-2017-008  
335 6
- 336 Bordbar, A., Monk, J. M., King, Z. A., and Palsson, B. O. (2014). Constraint-based models predict  
337 metabolic and associated cellular functions. *Nature Reviews. Genetics* 15, 107–120. doi:10.1038/nrg364  
338 3
- 339 Courtot, M., Juty, N., Knüpfer, C., Waltemath, D., Zhukova, A., Dräger, A., et al. (2011). Controlled  
340 vocabularies and semantics in systems biology. *Molecular Systems Biology* 7, 543. doi:10.1038/msb.20  
341 11.77
- 342 Ebrahim, A., Lerman, J. A., Palsson, B. O., and Hyduke, D. R. (2013). COBRApy: CONstraints-Based  
343 Reconstruction and Analysis for Python. *BMC systems biology* 7, 74. doi:10.1186/1752-0509-7-74
- 344 Gille, C., Bölling, C., Hoppe, A., Bulik, S., Hoffmann, S., Hübner, K., et al. (2010). HepatoNet1: A  
345 comprehensive metabolic reconstruction of the human hepatocyte for the analysis of liver physiology.  
346 *Molecular Systems Biology* 6, 411. doi:10.1038/msb.2010.62
- 347 Gomez, J. A., Höffner, K., and Barton, P. I. (2014). DFBAlab: A fast and reliable MATLAB code for  
348 dynamic flux balance analysis. *BMC Bioinformatics* 15, 409. doi:10.1186/s12859-014-0409-8
- 349 Hanly, T. J. and Henson, M. A. (2011). Dynamic flux balance modeling of microbial co-cultures for  
350 efficient batch fermentation of glucose and xylose mixtures. *Biotechnology and Bioengineering* 108,  
351 376–385. doi:10.1002/bit.22954
- 352 Hjersted, J. L., Henson, M. A., and Mahadevan, R. (2007). Genome-scale analysis of *Saccharomyces*  
353 *cerevisiae* metabolism and ethanol production in fed-batch culture. *Biotechnology and Bioengineering*  
354 97, 1190–1204. doi:10.1002/bit.21332
- 355 Höffner, K., Harwood, S. M., and Barton, P. I. (2013). A reliable simulator for dynamic flux balance  
356 analysis. *Biotechnology and Bioengineering* 110, 792–802. doi:10.1002/bit.24748
- 357 Hoops, S., Sahle, S., Gauges, R., Lee, C., Pahle, J., Simus, N., et al. (2006). COPASI—a COMplex  
358 PATHway SIMulator. *Bioinformatics* 22, 3067–3074. doi:10.1093/bioinformatics/btl485
- 359 Hucka, M., Bergmann, F. T., Chaouiya, C., Dräger, A., Hoops, S., Keating, S. M., et al. (2019). The  
360 Systems Biology Markup Language (SBML): Language specification for level 3 version 2 core release

- 361 2. *Journal of Integrative Bioinformatics* 16, /j/jib.2019.16.issue-2/jib-2019-0021/jib-2019-0021.xml.  
362 doi:10.1515/jib-2019-0021
- 363 Hucka, M., Finney, A., Sauro, H. M., Bolouri, H., Doyle, J. C., Kitano, H., et al. (2003). The systems  
364 biology markup language (SBML): A medium for representation and exchange of biochemical network  
365 models. *Bioinformatics (Oxford, England)* 19, 524–531. doi:10.1093/bioinformatics/btg015
- 366 Karr, J. R., Sanghvi, J. C., Macklin, D. N., Gutschow, M. V., Jacobs, J. M., Bolival, B., et al. (2012). A  
367 whole-cell computational model predicts phenotype from genotype. *Cell* 150, 389–401. doi:10.1016/j.  
368 cell.2012.05.044
- 369 Kauffman, S. A. (1969). Metabolic stability and epigenesis in randomly constructed genetic nets. *Journal*  
370 *of Theoretical Biology* 22, 437–467. doi:10.1016/0022-5193(69)90015-0
- 371 Keating, S. M., Waltemath, D., König, M., Zhang, F., Dräger, A., Chaouiya, C., et al. (2020). SBML Level  
372 3: An extensible format for the exchange and reuse of biological models. *Molecular systems biology* 16,  
373 e9110. doi:10.15252/msb.20199110
- 374 King, Z. A., Lu, J., Dräger, A., Miller, P., Federowicz, S., Lerman, J. A., et al. (2016). BiGG Models: A  
375 platform for integrating, standardizing and sharing genome-scale models. *Nucleic Acids Research* 44,  
376 D515–522. doi:10.1093/nar/gkv1049
- 377 Kitano, H. (2002). Computational systems biology. *Nature* 420, 206–210. doi:10.1038/nature01254
- 378 [Dataset] König, M. (2022). Sbmlutils: Python utilities for SBML. Zenodo. doi:10.5281/zenodo.6231726
- 379 König, M., Dräger, A., and Holzhütter, H.-G. (2012). CySBML: A Cytoscape plugin for SBML.  
380 *Bioinformatics (Oxford, England)* 28, 2402–2403. doi:10.1093/bioinformatics/bts432
- 381 Le Novère, N., Hucka, M., Mi, H., Moodie, S., Schreiber, F., Sorokin, A., et al. (2009). The Systems  
382 Biology Graphical Notation. *Nature Biotechnology* 27, 735–741. doi:10.1038/nbt.1558
- 383 Lequeux, G., Beauprez, J., Maertens, J., Van Horen, E., Soetaert, W., Vandamme, E., et al. (2010). Dynamic  
384 metabolic flux analysis demonstrated on cultures where the limiting substrate is changed from carbon to  
385 nitrogen and vice versa. *Journal of Biomedicine & Biotechnology* 2010, 621645. doi:20160811101003
- 386 Luo, R.-Y., Liao, S., Tao, G.-Y., Li, Y.-Y., Zeng, S., Li, Y.-X., et al. (2006). Dynamic analysis of optimality  
387 in myocardial energy metabolism under normal and ischemic conditions. *Molecular Systems Biology* 2,  
388 2006.0031. doi:10.1038/msb4100071
- 389 Mahadevan, R., Edwards, J. S., and Doyle, F. J. (2002). Dynamic flux balance analysis of diauxic growth  
390 in *Escherichia coli*. *Biophysical Journal* 83, 1331–1340. doi:10.1016/S0006-3495(02)73903-9
- 391 Mahadevan, R. and Schilling, C. H. (2003). The effects of alternate optimal solutions in constraint-based  
392 genome-scale metabolic models. *Metabolic Engineering* 5, 264–276. doi:10.1016/j.ymben.2003.09.002
- 393 Meadows, A. L., Karnik, R., Lam, H., Forestell, S., and Snedecor, B. (2010). Application of dynamic flux  
394 balance analysis to an industrial *Escherichia coli* fermentation. *Metabolic Engineering* 12, 150–160.  
395 doi:10.1016/j.ymben.2009.07.006
- 396 Morris, M. K., Saez-Rodriguez, J., Sorger, P. K., and Lauffenburger, D. A. (2010). Logic-based models for  
397 the analysis of cell signaling networks. *Biochemistry* 49, 3216–3224. doi:10.1021/bi902202q
- 398 Neal, M. L., Gennari, J. H., Waltemath, D., Nickerson, D. P., and König, M. (2020). Open modeling  
399 and exchange (OMEX) metadata specification version 1.0. *Journal of Integrative Bioinformatics* 17.  
400 doi:10.1515/jib-2020-0020
- 401 Neal, M. L., König, M., Nickerson, D., Mısırlı, G., Kalbasi, R., Dräger, A., et al. (2019). Harmonizing  
402 semantic annotations for computational models in biology. *Briefings in Bioinformatics* 20, 540–550.  
403 doi:10.1093/bib/bby087
- 404 Orth, J. D., Fleming, R. M. T., and Palsson, B. Ø. (2010). Reconstruction and use of microbial metabolic  
405 networks: The core *Escherichia coli* metabolic model as an educational guide. *EcoSal Plus* 4. doi:10.1

- 406 128/ecosalplus.10.2.1
- 407 Pizarro, F., Varela, C., Martabit, C., Bruno, C., Pérez-Correa, J. R., and Agosin, E. (2007). Coupling  
408 kinetic expressions and metabolic networks for predicting wine fermentations. *Biotechnology and*  
409 *Bioengineering* 98, 986–998. doi:10.1002/bit.21494
- 410 Savinell, J. M. and Palsson, B. O. (1992). Network analysis of intermediary metabolism using linear  
411 optimization. I. Development of mathematical formalism. *Journal of Theoretical Biology* 154, 421–454.  
412 doi:10.1016/s0022-5193(05)80161-4
- 413 Smith, L. P., Hucka, M., Hoops, S., Finney, A., Ginkel, M., Myers, C. J., et al. (2015). SBML Level 3  
414 package: Hierarchical Model Composition, Version 1 Release 3. *Journal of Integrative Bioinformatics*  
415 12, 268. doi:10.2390/biecoll-jib-2015-268
- 416 Somogyi, E. T., Bouteiller, J.-M., Glazier, J. A., König, M., Medley, J. K., Swat, M. H., et al. (2015).  
417 libRoadRunner: A high performance SBML simulation and analysis library. *Bioinformatics (Oxford,*  
418 *England)* 31, 3315–3321. doi:10.1093/bioinformatics/btv363
- 419 Thomas, R. (1973). Boolean formalization of genetic control circuits. *Journal of Theoretical Biology* 42,  
420 563–585. doi:10.1016/0022-5193(73)90247-6
- 421 Tomita, M., Hashimoto, K., Takahashi, K., Shimizu, T. S., Matsuzaki, Y., Miyoshi, F., et al. (1999).  
422 E-CELL: Software environment for whole-cell simulation. *Bioinformatics (Oxford, England)* 15, 72–84.  
423 doi:10.1093/bioinformatics/15.1.72
- 424 Varma, A., Boesch, B. W., and Palsson, B. O. (1993). Biochemical production capabilities of *Escherichia*  
425 *coli*. *Biotechnology and Bioengineering* 42, 59–73. doi:10.1002/bit.260420109
- 426 Varma, A. and Palsson, B. O. (1994). Stoichiometric flux balance models quantitatively predict growth  
427 and metabolic by-product secretion in wild-type *Escherichia coli* W3110. *Applied and Environmental*  
428 *Microbiology* 60, 3724–3731. doi:10.1128/aem.60.10.3724-3731.1994
- 429 Waltemath, D., Karr, J. R., Bergmann, F. T., Chelliah, V., Hucka, M., Krantz, M., et al. (2016).  
430 Toward community standards and software for whole-cell modeling. *IEEE transactions on bio-medical*  
431 *engineering* 63, 2007–2014. doi:10.1109/TBME.2016.2560762
- 432 Watanabe, L., Nguyen, T., Zhang, M., Zundel, Z., Zhang, Z., Madsen, C., et al. (2019). iBioSim 3: A tool  
433 for model-based genetic circuit design. *ACS synthetic biology* 8, 1560–1563. doi:10.1021/acssynbio.8b  
434 00078
- 435 Watanabe, L. H. and Myers, C. J. (2014). Hierarchical stochastic simulation algorithm for sbml models of  
436 genetic circuits. *Frontiers in Bioengineering and Biotechnology* 2, 55. doi:10.3389/fbioe.2014.00055
- 437 Zhukova, A., Waltemath, D., Juty, N., Laibe, C., and Le Novère, N. (2011). Kinetic simulation algorithm  
438 ontology. *Nature Precedings* , 1–1doi:10.1038/npre.2011.6330.1
